# Supplementary material for: A new parrot taxon from the Yucatán Peninsula, Mexico—its position within genus Amazona based on morphology and molecular phylogeny
Source: PeerJ journal article supplement (doi:10.7717/peerj.3475), 2017-06-27

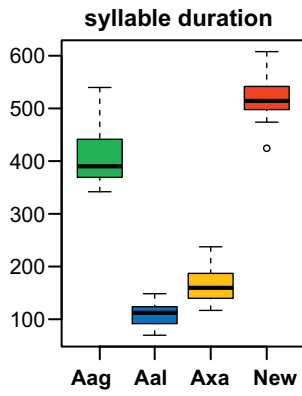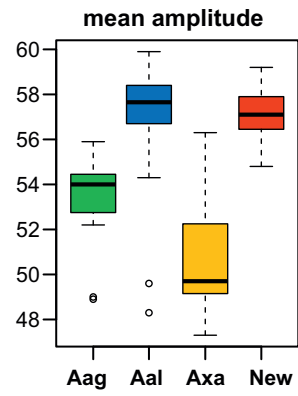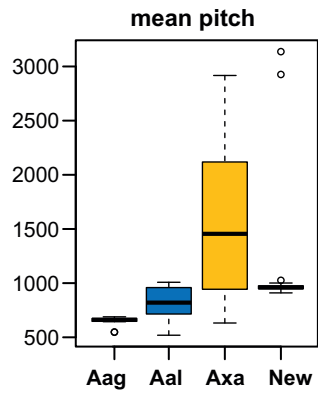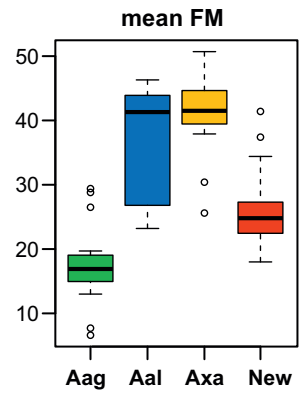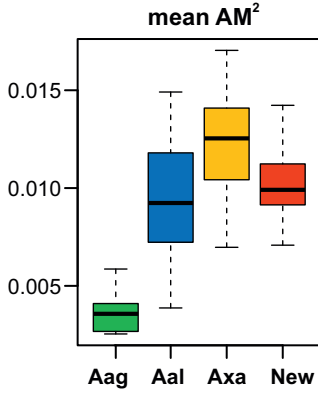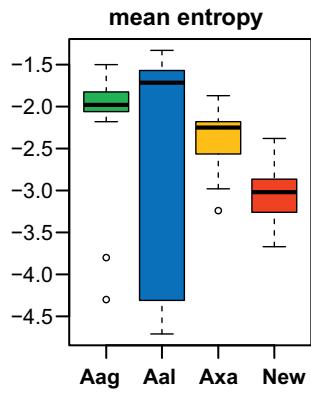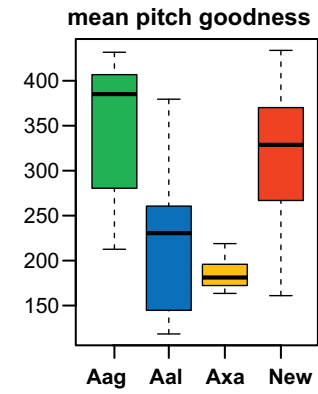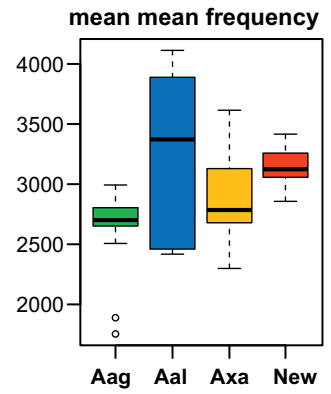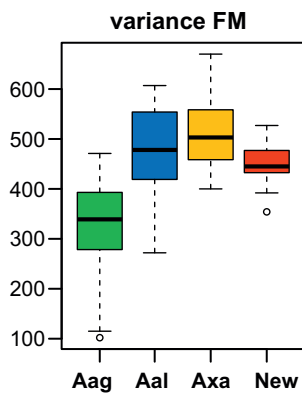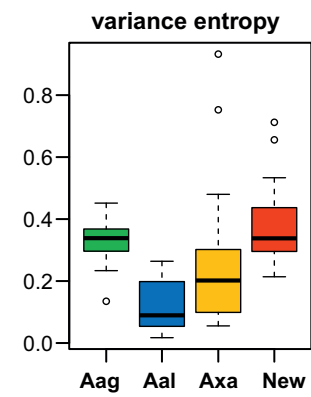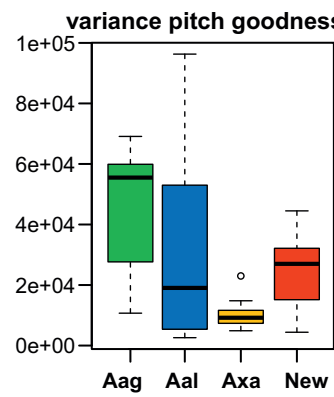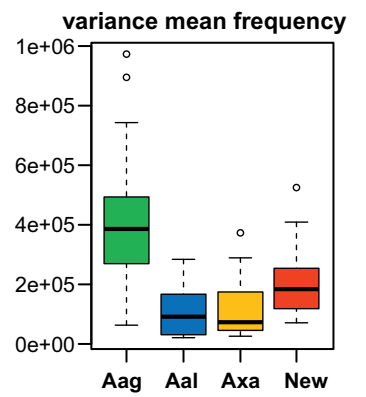

Supplement: Figure_S2.pdf [file Figure_S2.pdf]
