# Supplementary material for: A new parrot taxon from the Yucatán Peninsula, Mexico—its position within genus Amazona based on morphology and molecular phylogeny
Source: PeerJ journal article supplement (doi:10.7717/peerj.3475), 2017-06-27
Supplement: Table_S3.pdf [file Table_S3.pdf]

**Table S3.** Values of parameters and the Akaike information criterion (AIC) for different diversification models fitted to the time-calibrated phylogeny.

| Model description                                                                                                                        | Model name                     | Parameters                                                                                                                                                        | AIC     | $\Delta$ AIC |
|------------------------------------------------------------------------------------------------------------------------------------------|--------------------------------|-------------------------------------------------------------------------------------------------------------------------------------------------------------------|---------|--------------|
| Constant-rate models                                                                                                                     | Pure birth (Yule)              | $\lambda=0.492$                                                                                                                                                   | -101.68 | 0.99         |
|                                                                                                                                          | Constant-rate birth–death (BD) | $\lambda=0.276$<br>$\mu=0.639$                                                                                                                                    | -102.52 | 0.15         |
| Variable-rate models assuming different speciation rates within specified time intervals                                                 | Yule2rate                      | $\lambda_1=0.484$<br>$t_1=0.060$<br>$\lambda_2=0.750$                                                                                                             | -100.93 | 1.74         |
|                                                                                                                                          | Yule3rate                      | $\lambda_1=0.567$<br>$t_1=2.828$<br>$\lambda_2=0.195$<br>$t_2=1.305$<br>$\lambda_3=0.644$                                                                         | -101.55 | 1.12         |
|                                                                                                                                          | Yule4rate                      | $\lambda_1=0.138$<br>$t_1=5.099$<br>$\lambda_2=0.934$<br>$t_2=3.199$<br>$\lambda_3=0.229$<br>$t_3=1.305$<br>$\lambda_4=0.644$                                     | -102.67 | 0.00         |
|                                                                                                                                          | Yule4rate                      | $\lambda_1=0.138$<br>$t_1=5.099$<br>$\lambda_2=0.934$<br>$t_2=3.199$<br>$\lambda_3=0.274$<br>$t_3=1.024$<br>$\lambda_4=5.511$<br>$t_4=1.017$<br>$\lambda_5=0.642$ | -100.22 | 2.45         |
| Variable-rate model assuming decreasing diversification through time in relation to increasing diversity with exponential fitting        | DDX                            | $\lambda=0.264$<br>$x=-0.219$                                                                                                                                     | -100.92 | 1.75         |
| Variable-rate model assuming decreasing diversification through time in relation to increasing diversity with logistic fitting           | DDL                            | $\lambda=0.492$<br>$k=799068$                                                                                                                                     | -99.68  | 2.99         |
| Variable-rate model assuming decreasing diversification through time caused by decreasing speciation rate                                | SPVAR                          | $\lambda=0.770$<br>$\mu=0.491$<br>$k=0.001$                                                                                                                       | -100.51 | 2.16         |
| Variable-rate model assuming decreasing diversification through time caused by increasing extinction rate                                | EXVAR                          | $\lambda=0.763$<br>$\mu=0.487$<br>$z=383.01$                                                                                                                      | -100.52 | 2.15         |
| Variable-rate model assuming decreasing diversification through time caused by decreasing speciation rate and increasing extinction rate | BOTHVAR                        | $\lambda=0.770$<br>$\mu=0.491$<br>$k=0.001$<br>$z=384.43$                                                                                                         | -98.51  | 4.16         |

$\lambda$ , speciation;  $\mu$ , extinction;  $t$ , time of rate-shift in millions of years ago;  $x$ , parameter controlling the magnitude of the rate change;  $K$ , parameter analogous to the ‘carrying capacity’ parameter in population ecology;  $k$ , parameter of the exponential change in speciation rate;  $z$ , parameter of the exponential change in extinction rate.
